# Supplementary material
Source: PubMed Central journal article supplement (PMC3533641)
Supplement: 12_277_Li.Suppl.pdf [file 12_277_Li.Suppl.pdf]

Supplemental Data

STAT1, STAT6 and Adenosine 3',5'-Cyclic Monophosphate (cAMP) Signaling Drive SOCS3 Expression in Inactive Ulcerative Colitis

Yi Li,<sup>1,2</sup> Jasper Deuring,<sup>1</sup> Maikel P Peppelenbosch,<sup>1</sup> Ernst J Kuipers,<sup>1</sup> Colin de Haar,<sup>1\*</sup> and C Janneke van der Woude<sup>1\*</sup>

Online address: <http://www.molmed.org>

The Feinstein Institute for Medical Research 

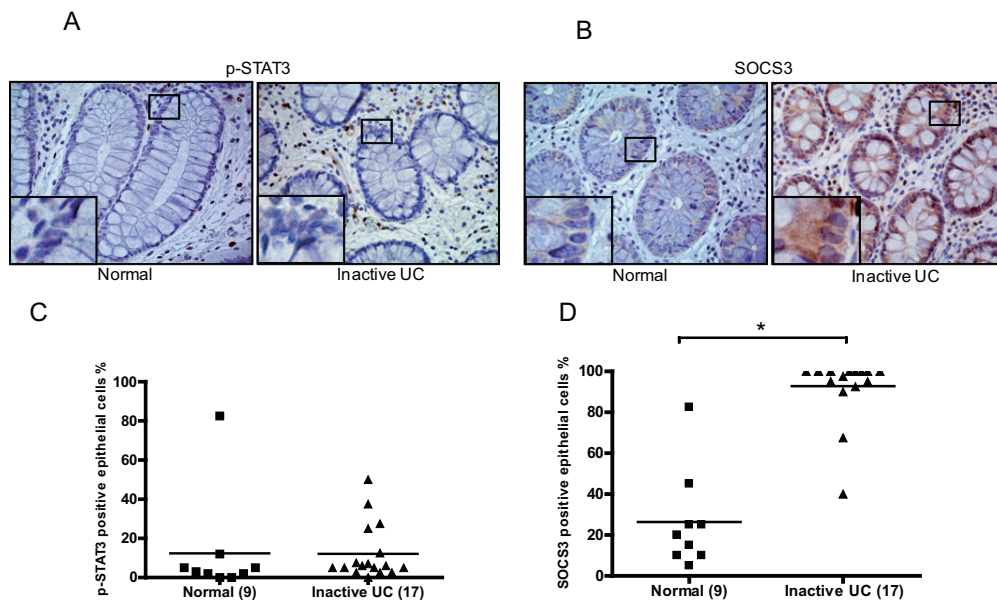

**Supplementary Figure S1.** IHC staining of p-STAT3 (A) and SOCS3 (B) IEC positive cells between patients with inactive UC and controls. Quantification of the percentage positive IEC in each biopsy showed increased SOCS3 expression ( $p < 0.0001$ ) (D) corresponded with low p-STAT3 expression ( $p = 0.1286$ ) (C) in patients with inactive UC compared with controls.
